# Supplementary material for: High-density sulfonic acid-grafted covalent organic frameworks with efficient anhydrous proton conduction
Source: Royal Society of Chemistry journal article supplement (doi:10.1039/d2ta00793b), 2022-01-01
Supplement: d2ta00793b1.pdf [file d2ta00793b1.pdf]

# Electronic Supplementary Information

## High-density Sulfonic Acid-grafted Covalent Organic Framework with Efficient Anhydrous Proton Conduction

Yu Guo,<sup>1,†</sup> Xiuyang Zou,<sup>1,†</sup> Weizheng Li,<sup>1</sup> Yin Hu,<sup>1</sup> Zhiyu Jin,<sup>1</sup> Zhe Sun,<sup>1</sup> Shicheng Gong,<sup>2</sup> Siyu Guo,<sup>1,\*</sup> and Feng Yan<sup>1,\*</sup>

<sup>1</sup> Jiangsu Engineering Laboratory of Novel Functional Polymeric Materials, College of Chemistry, Chemical Engineering and Materials Science, Soochow University, Suzhou, 215123, China.

<sup>2</sup> State Key Laboratory of Radiation Medicine and Protection, School for Radiological and interdisciplinary Sciences (RAD-X) and Collaborative Innovation Center of Radiation Medicine of Jiangsu Higher Education Institutions, Soochow University, Suzhou, 215123, China.

\* Correspondence to [syguo@suda.edu.cn](mailto:syguo@suda.edu.cn) (S. G.) and [fyan@suda.edu.cn](mailto:fyan@suda.edu.cn) (F. Y.)

† Authors with equal contributions.

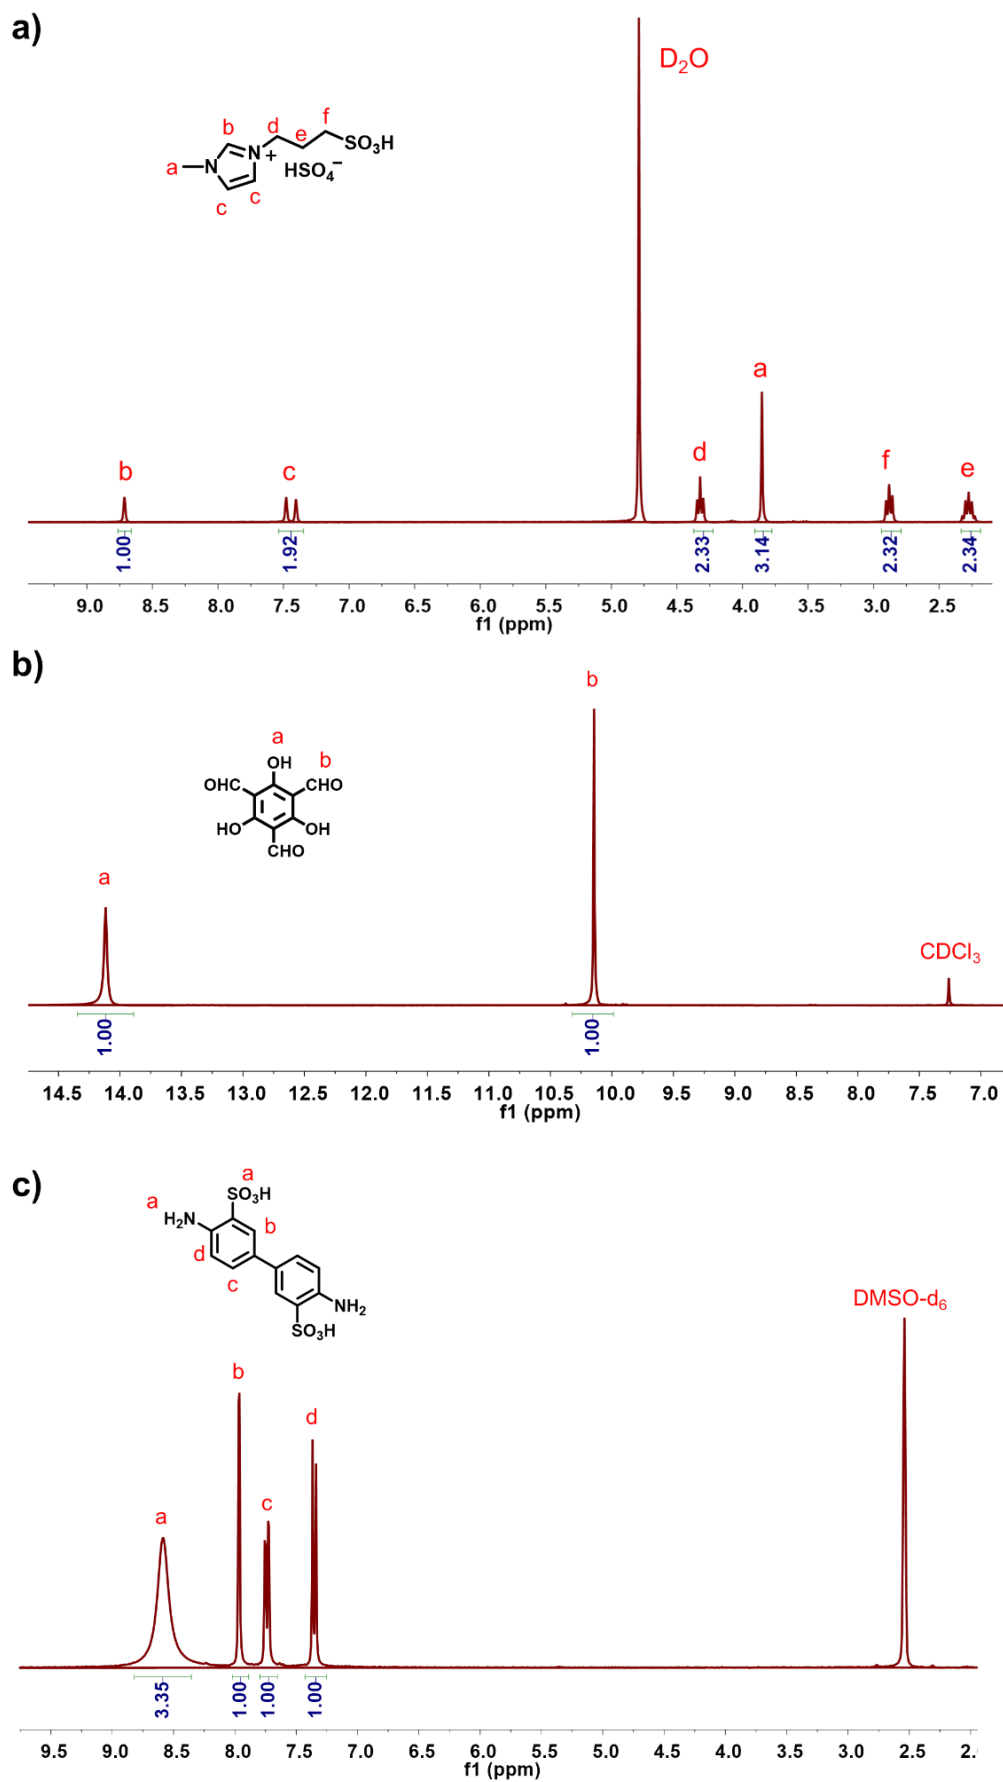

**Figure S1.**  $^1\text{H}$  NMR of spectrum of (a) [PSMIm][ $\text{HSO}_4$ ], (b) Tp and (c) BD-( $\text{SO}_3\text{H}$ ) $_2$ .

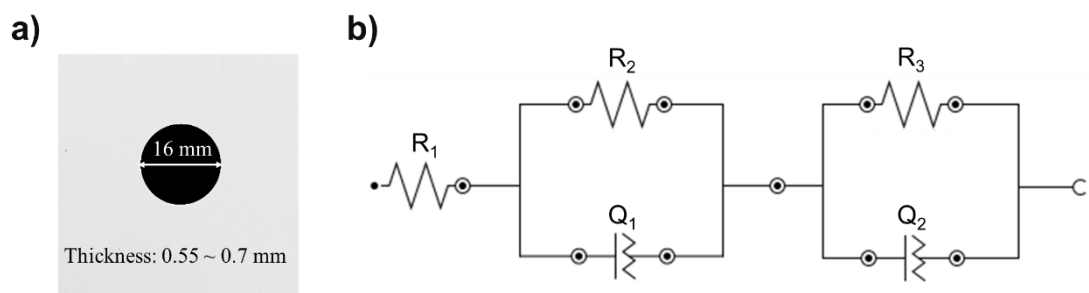

**Figure S2.** (a) Digital image of the TB-COF pallet for proton conductivity measurements. (b) Equivalent circuit model representation for the proton conduction in COFs wherein  $R_1$ ,  $R_2$ ,  $R_3$  represent resistors and  $Q_1$ ,  $Q_2$  represent imperfect capacitors in the circuit.

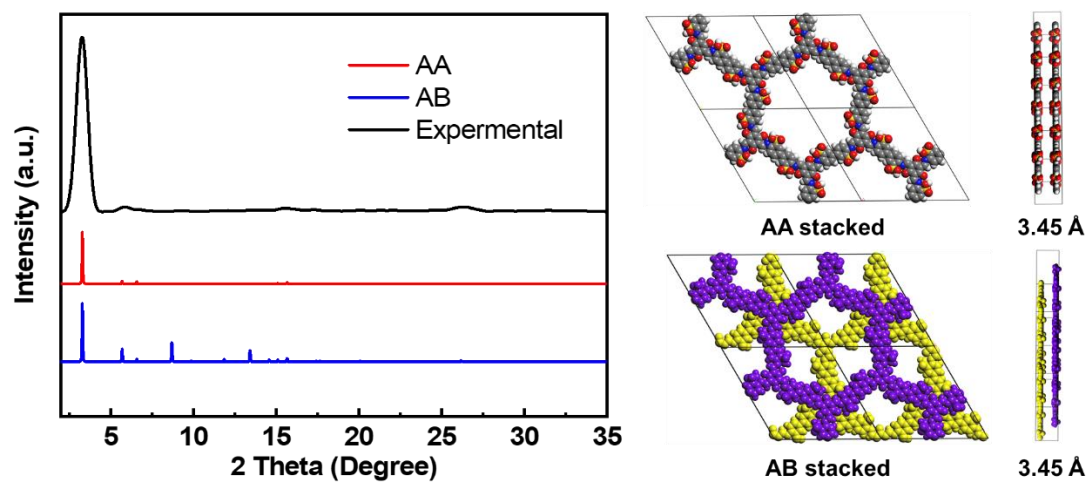

**Figure S3.** Experimental PXRD spectra of TB-COF and simulated PXRD of TB-COF with AA and AB stacking models.

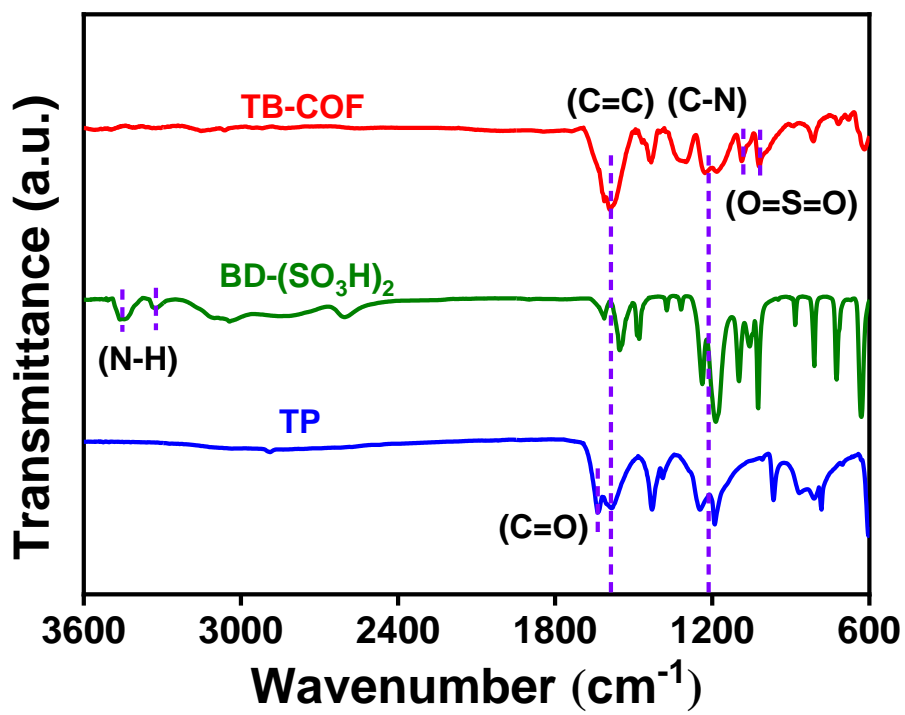

Figure S4. FTIR spectra of TB-COF and corresponding monomers.

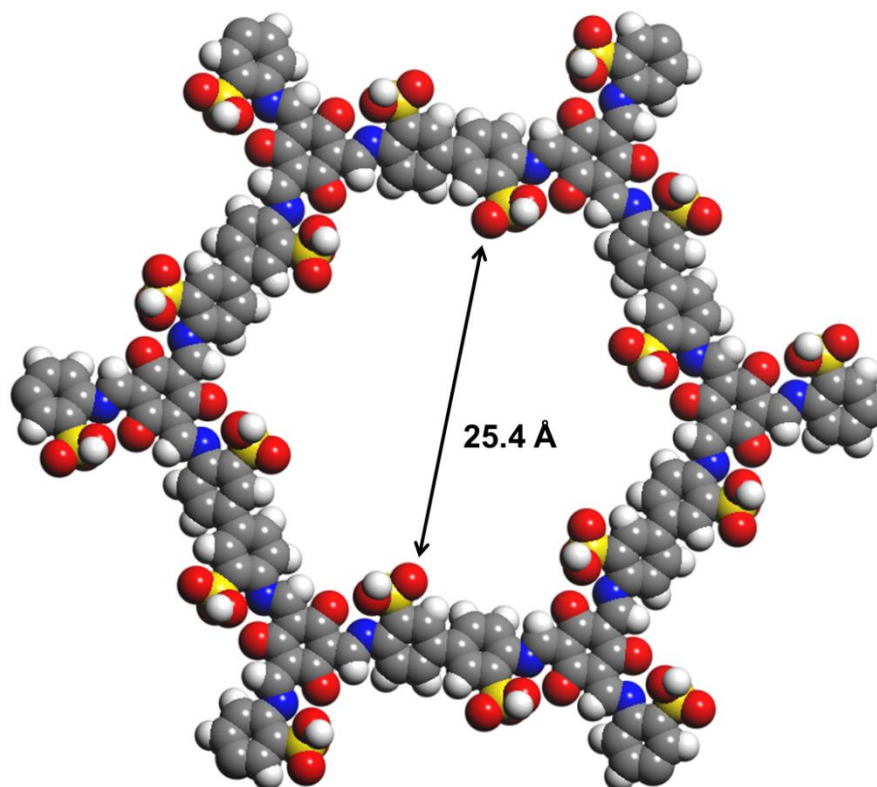

**Figure S5.** DFT-optimized TB-COF, which shows the values of pore diameter.

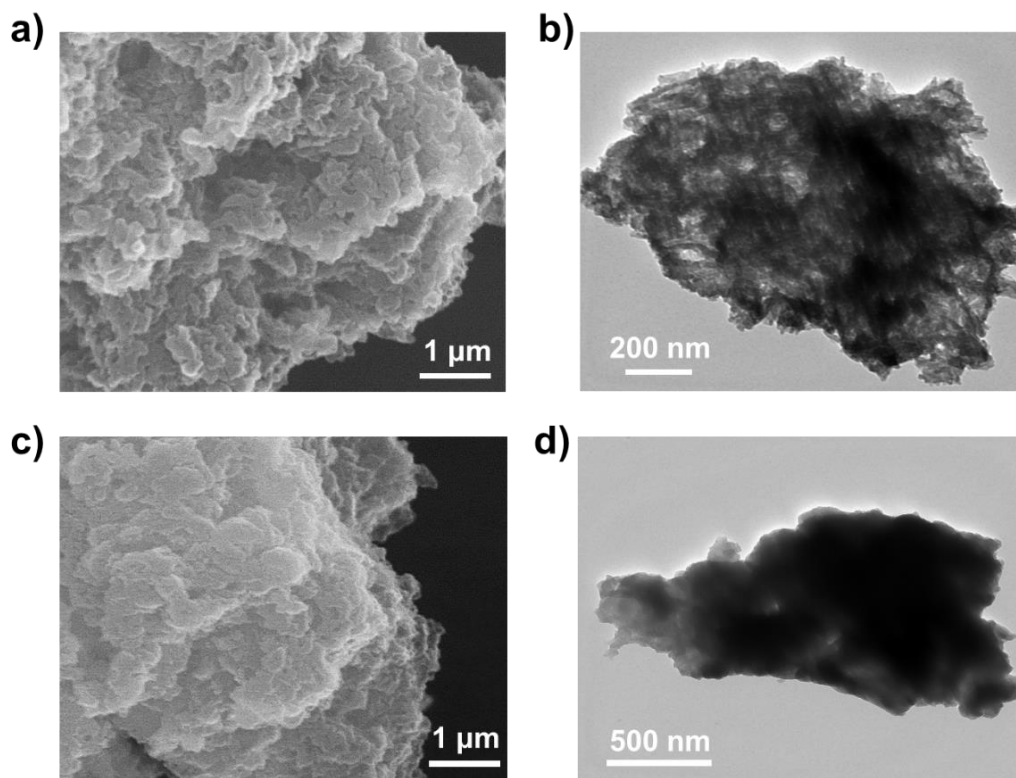

**Figure S6.** (a) SEM images of TB-COF. (b) TEM images of TB-COF. (c) SEM images of PIL-TB-COF. (d) TEM images of PIL-TB-COF.

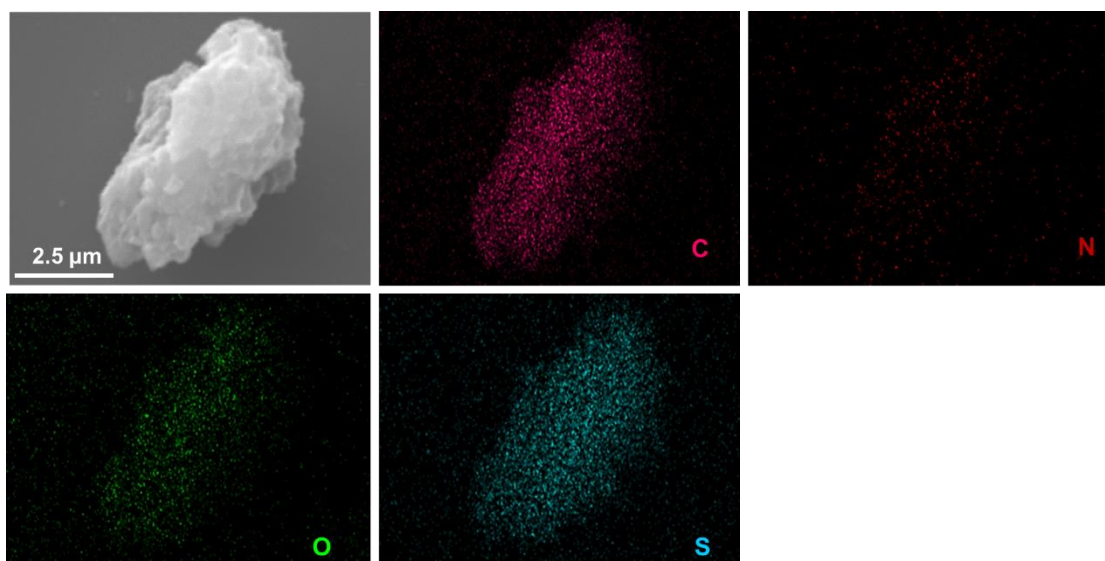

**Figure S7.** EDS mapping images of TB-COF.



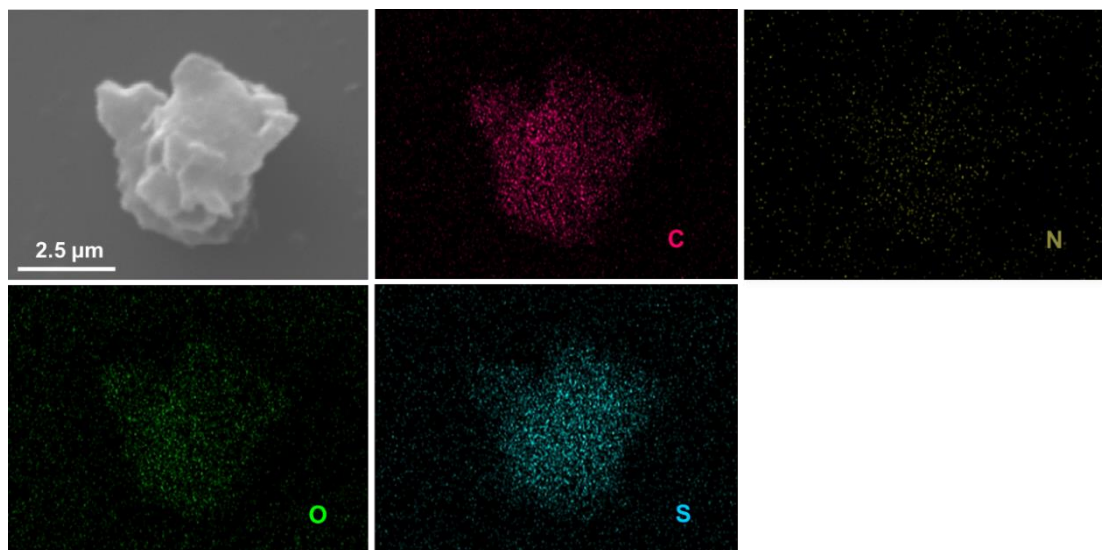

**Figure S8.** EDS mapping images of PIL-TB-COF.

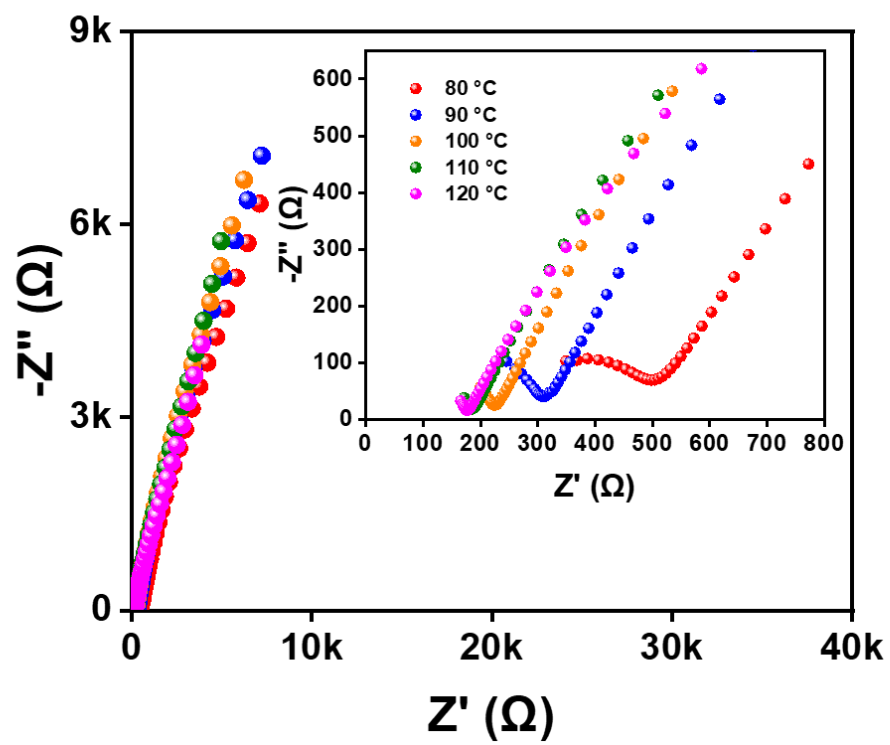

**Figure S9.** Nyquist plots of TB-COF measured at different temperatures under anhydrous conditions.

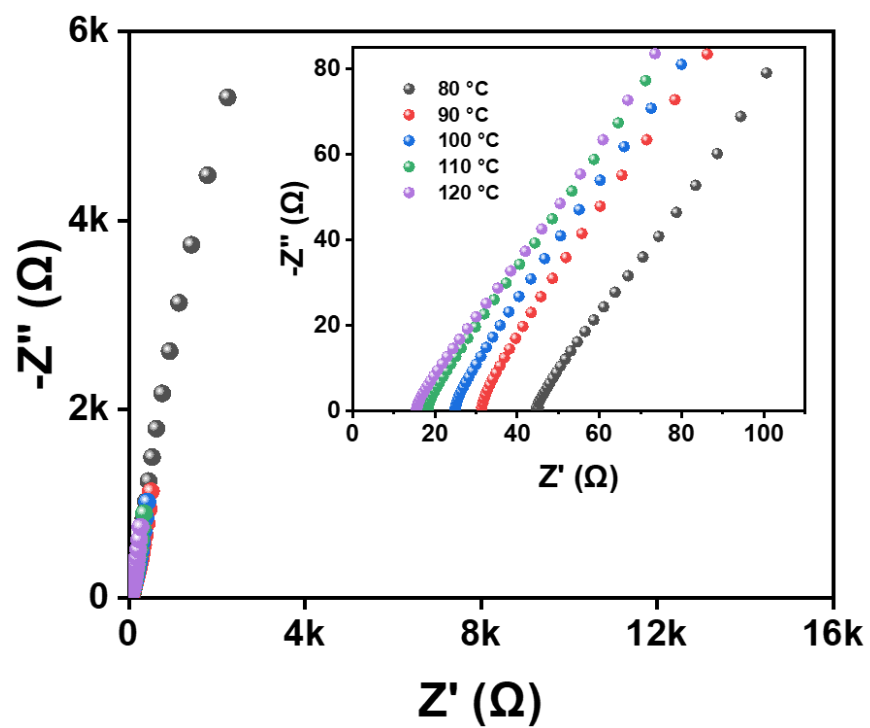

**Figure S10.** Nyquist plots of PIL-TB-COF measured at different temperatures under anhydrous conditions.

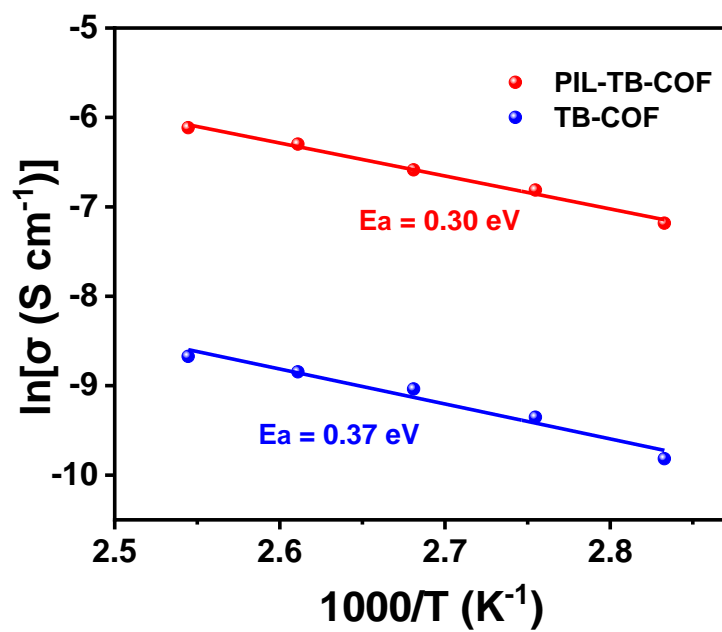

**Figure S11.** Arrhenius plots for TB-COF (blue) and PIL-TB-COF (red).

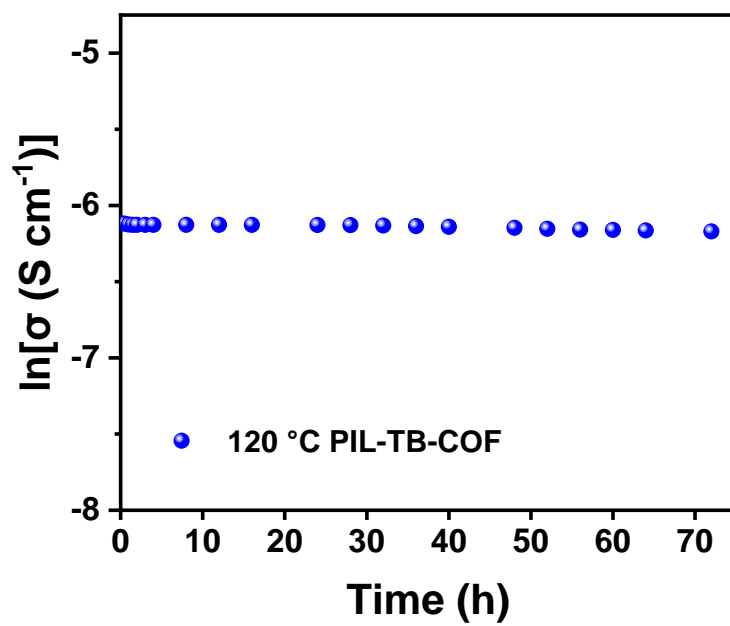

**Figure S12.** Long-period proton conductivity test for PIL-TB-COF at 120 °C.

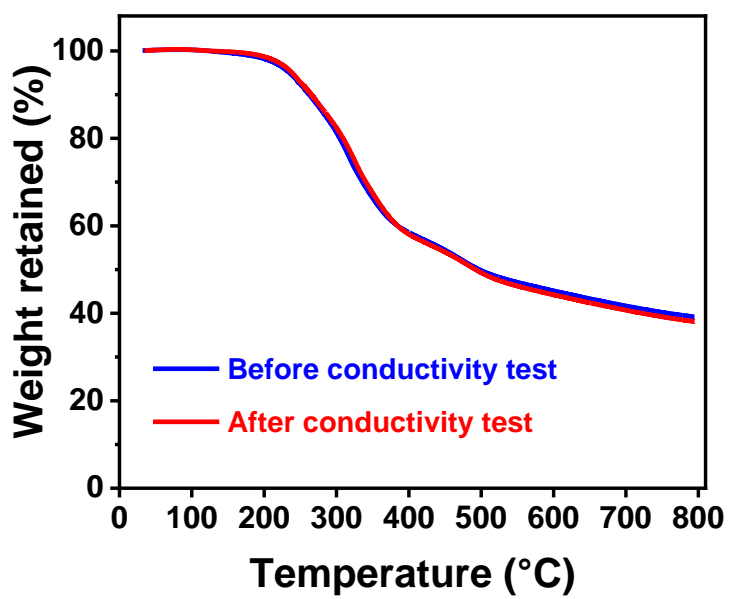

**Figure S13.** TGA curves of PIL-TB-COF before and after conductivity test.

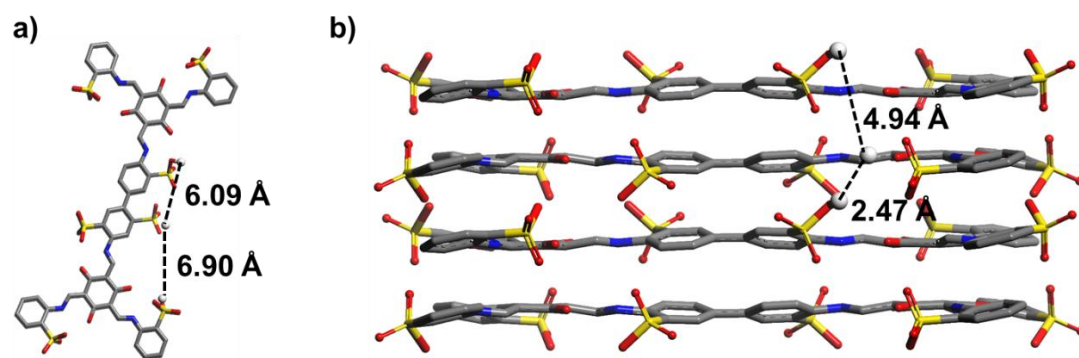

**Figure S14.** H-ion hopping distances in the (a) planar and (b) axial pathways in TB-COF.

**Table S1.** Structural parameters for the unit cell of TB-COF.

| TB-COF            |                                                                                  |
|-------------------|----------------------------------------------------------------------------------|
| Empirical formula | C <sub>108</sub> H <sub>60</sub> N <sub>12</sub> O <sub>48</sub> S <sub>12</sub> |
| Symmetry          | Hexagonal                                                                        |
| Space group       | <i>P622</i>                                                                      |
| <i>a</i> (Å)      | 31.041254                                                                        |
| <i>b</i> (Å)      | 31.041254                                                                        |
| <i>c</i> (Å)      | 6.802055                                                                         |
| <i>α</i> (deg.)   | 90                                                                               |
| <i>β</i> (deg.)   | 90                                                                               |
| <i>γ</i> (deg.)   | 120                                                                              |



**Table S2.** Atomic coordinates for the unit cell of TB-COF.

| Atom list | <i>x</i> | <i>y</i> | <i>z</i> |
|-----------|----------|----------|----------|
| O1        | 15.10188 | -0.27275 | 1.913059 |
| C2        | 11.30339 | 10.799   | 1.780671 |
| C3        | 12.7488  | 10.87465 | 2.074842 |
| C4        | 13.57424 | 9.702482 | 2.006182 |
| C5        | 13.01224 | 8.382189 | 1.687127 |
| C6        | 11.57374 | 8.296091 | 1.407781 |
| C7        | 10.7486  | 9.467259 | 1.452401 |
| N8        | 10.41777 | 11.88618 | 1.900078 |
| C9        | 8.337356 | 14.1057  | 1.963332 |
| C10       | 7.462941 | 15.36235 | 2.006657 |
| C11       | 6.028378 | 15.11467 | 1.776741 |
| H12       | 13.18912 | 11.87565 | 2.432501 |
| H13       | 14.68975 | 9.797221 | 2.259265 |
| H14       | 11.07907 | 7.294705 | 1.140157 |
| S15       | 8.932954 | 9.201367 | 1.330632 |
| H16       | 5.779516 | 14.03353 | 1.426597 |
| O17       | 8.428527 | 10.31871 | 0.212026 |
| O18       | 8.354261 | 9.56549  | 2.661341 |
| O19       | 8.706831 | 7.838362 | 0.737702 |
| H20       | 8.026105 | 9.810132 | -0.5902  |

|     |          |          |          |
|-----|----------|----------|----------|
| O21 | 19.56772 | -2.30584 | 1.913059 |
| C22 | 11.87855 | 19.90995 | 1.780671 |
| C23 | 11.09033 | 21.12388 | 2.074842 |
| C24 | 11.69274 | 22.42482 | 2.006182 |
| C25 | 13.11715 | 22.59826 | 1.687127 |
| C26 | 13.91096 | 21.39553 | 1.407781 |
| C27 | 13.30927 | 20.09536 | 1.452401 |
| N28 | 11.37984 | 18.59939 | 1.900078 |
| C29 | 10.49788 | 15.68794 | 1.963332 |
| C30 | 9.8468   | 14.30235 | 2.006657 |
| C31 | 10.77858 | 13.18382 | 1.776741 |
| H32 | 10.00328 | 21.00471 | 2.432501 |
| H33 | 11.05294 | 23.34351 | 2.259265 |
| H34 | 15.02552 | 21.46783 | 1.140157 |
| S35 | 14.44736 | 18.65591 | 1.330632 |
| H36 | 11.8393  | 13.50887 | 1.426597 |
| O37 | 13.73192 | 17.66039 | 0.212026 |
| O38 | 14.42137 | 17.97268 | 2.661341 |
| O39 | 15.74082 | 19.14158 | 0.737702 |
| H40 | 14.37358 | 17.56617 | -0.5902  |
| C41 | 3.700661 | 15.85258 | 1.780671 |
| C42 | 3.043469 | 14.56299 | 2.074842 |

|     |          |          |          |
|-----|----------|----------|----------|
| C43 | 1.615619 | 14.43422 | 2.006182 |
| C44 | 0.753214 | 15.58108 | 1.687127 |
| C45 | 1.3979   | 16.8699  | 1.407781 |
| C46 | 2.824733 | 16.99891 | 1.452401 |
| N47 | 5.084994 | 16.07596 | 1.900078 |
| C48 | 8.047364 | 16.76789 | 1.963332 |
| C49 | 9.572859 | 16.89683 | 2.006657 |
| C50 | 10.07565 | 18.26304 | 1.776741 |
| H51 | 3.690203 | 13.68117 | 2.432501 |
| H52 | 1.139914 | 13.4208  | 2.259265 |
| H53 | 0.778012 | 17.799   | 1.140157 |
| S54 | 3.502286 | 18.70425 | 1.330632 |
| H55 | 9.263782 | 19.01913 | 1.426597 |
| O56 | 4.722149 | 18.58243 | 0.212026 |
| O57 | 4.106972 | 19.02335 | 2.661341 |
| O58 | 2.434951 | 19.58158 | 0.737702 |
| H59 | 4.482916 | 19.18522 | -0.5902  |
| O60 | 19.09551 | 2.578234 | 1.913059 |
| O61 | 11.78069 | 15.79314 | 1.913059 |
| C62 | 15.57918 | 4.721388 | 1.780671 |
| C63 | 14.13378 | 4.645741 | 2.074842 |
| C64 | 13.30833 | 5.817908 | 2.006182 |

|     |          |          |          |
|-----|----------|----------|----------|
| C65 | 13.87033 | 7.138201 | 1.687127 |
| C66 | 15.30883 | 7.224299 | 1.407781 |
| C67 | 16.13397 | 6.053131 | 1.452401 |
| N68 | 16.4648  | 3.63421  | 1.900078 |
| C69 | 18.54522 | 1.414687 | 1.963332 |
| C70 | 19.41963 | 0.158041 | 2.006657 |
| C71 | 20.85419 | 0.405719 | 1.776741 |
| H72 | 13.69346 | 3.64474  | 2.432501 |
| H73 | 12.19283 | 5.72317  | 2.259265 |
| H74 | 15.80351 | 8.225685 | 1.140157 |
| S75 | 17.94962 | 6.319023 | 1.330632 |
| H76 | 21.10306 | 1.486858 | 1.426597 |
| O77 | 18.45404 | 5.201677 | 0.212026 |
| O78 | 18.52831 | 5.9549   | 2.661341 |
| O79 | 18.17574 | 7.682028 | 0.737702 |
| H80 | 18.85647 | 5.710258 | -0.5902  |
| C81 | 15.00402 | -4.38956 | 1.780671 |
| C82 | 15.79224 | -5.60349 | 2.074842 |
| C83 | 15.18984 | -6.90443 | 2.006182 |
| C84 | 13.76543 | -7.07787 | 1.687127 |
| C85 | 12.97161 | -5.87514 | 1.407781 |
| C86 | 13.5733  | -4.57497 | 1.452401 |

|      |          |          |          |
|------|----------|----------|----------|
| N87  | 15.50274 | -3.079   | 1.900078 |
| C88  | 16.38469 | -0.16755 | 1.963332 |
| C89  | 17.03577 | 1.218044 | 2.006657 |
| C90  | 16.104   | 2.336572 | 1.776741 |
| H91  | 16.87929 | -5.48432 | 2.432501 |
| H92  | 15.82963 | -7.82312 | 2.259265 |
| H93  | 11.85705 | -5.94744 | 1.140157 |
| S94  | 12.43521 | -3.13552 | 1.330632 |
| H95  | 15.04327 | 2.011524 | 1.426597 |
| O96  | 13.15065 | -2.14    | 0.212026 |
| O97  | 12.4612  | -2.45229 | 2.661341 |
| O98  | 11.14175 | -3.62119 | 0.737702 |
| H99  | 12.50899 | -2.04578 | -0.5902  |
| O100 | 7.314852 | 17.82623 | 1.913059 |
| O101 | 7.787059 | 12.94216 | 1.913059 |
| C102 | 23.18191 | -0.33219 | 1.780671 |
| C103 | 23.8391  | 0.957396 | 2.074842 |
| C104 | 25.26695 | 1.086171 | 2.006182 |
| C105 | 26.12936 | -0.06069 | 1.687127 |
| C106 | 25.48467 | -1.34951 | 1.407781 |
| C107 | 24.05784 | -1.47852 | 1.452401 |
| N108 | 21.79758 | -0.55557 | 1.900078 |

|      |          |          |          |
|------|----------|----------|----------|
| C109 | 18.83521 | -1.2475  | 1.963332 |
| C110 | 17.30971 | -1.37644 | 2.006657 |
| C111 | 16.80693 | -2.74265 | 1.776741 |
| H112 | 23.19237 | 1.839223 | 2.432501 |
| H113 | 25.74266 | 2.099593 | 2.259265 |
| H114 | 26.10456 | -2.27861 | 1.140157 |
| S115 | 23.38029 | -3.18386 | 1.330632 |
| H116 | 17.61879 | -3.49874 | 1.426597 |
| O117 | 22.16042 | -3.06204 | 0.212026 |
| O118 | 22.7756  | -3.50296 | 2.661341 |
| O119 | 24.44762 | -4.06119 | 0.737702 |
| H120 | 22.39966 | -3.66483 | -0.5902  |
| O121 | 7.314852 | 13.21479 | 4.88906  |
| C122 | 15.00402 | 4.389318 | 5.021448 |
| C123 | 15.79224 | 5.603255 | 4.727277 |
| C124 | 15.18984 | 6.904197 | 4.795937 |
| C125 | 13.76543 | 7.077633 | 5.114992 |
| C126 | 12.97161 | 5.874906 | 5.394338 |
| C127 | 13.5733  | 4.574728 | 5.349719 |
| N128 | 15.50274 | 3.078761 | 4.902041 |
| C129 | 16.38469 | 0.167308 | 4.838787 |
| C130 | 17.03577 | -1.21828 | 4.795462 |

|      |          |          |          |
|------|----------|----------|----------|
| C131 | 16.104   | -2.33681 | 5.025378 |
| H132 | 16.87929 | 5.484081 | 4.369618 |
| H133 | 15.82963 | 7.822881 | 4.542854 |
| H134 | 11.85705 | 5.947198 | 5.661962 |
| S135 | 12.43521 | 3.13528  | 5.471487 |
| H136 | 15.04327 | -2.01176 | 5.375522 |
| O137 | 13.15065 | 2.13976  | 6.590093 |
| O138 | 12.4612  | 2.452055 | 4.140778 |
| O139 | 11.14175 | 3.620954 | 6.064417 |
| H140 | 12.50899 | 2.045543 | 7.392321 |
| O141 | 7.787059 | 18.09886 | 4.88906  |
| C142 | 23.18191 | 0.331952 | 5.021448 |
| C143 | 23.8391  | -0.95763 | 4.727277 |
| C144 | 25.26695 | -1.08641 | 4.795937 |
| C145 | 26.12936 | 0.060449 | 5.114992 |
| C146 | 25.48467 | 1.349275 | 5.394338 |
| C147 | 24.05784 | 1.478285 | 5.349719 |
| N148 | 21.79758 | 0.55533  | 4.902041 |
| C149 | 18.83521 | 1.24726  | 4.838787 |
| C150 | 17.30971 | 1.376204 | 4.795462 |
| C151 | 16.80693 | 2.742409 | 5.025378 |
| H152 | 23.19237 | -1.83946 | 4.369618 |

|      |          |          |          |
|------|----------|----------|----------|
| H153 | 25.74266 | -2.09983 | 4.542854 |
| H154 | 26.10456 | 2.278369 | 5.661962 |
| S155 | 23.38029 | 3.183625 | 5.471487 |
| H156 | 17.61879 | 3.4985   | 5.375522 |
| O157 | 22.16042 | 3.061799 | 6.590093 |
| O158 | 22.7756  | 3.502727 | 4.140778 |
| O159 | 24.44762 | 4.060956 | 6.064417 |
| H160 | 22.39966 | 3.664597 | 7.392321 |
| C161 | 15.57918 | -4.72163 | 5.021448 |
| C162 | 14.13378 | -4.64598 | 4.727277 |
| C163 | 13.30833 | -5.81815 | 4.795937 |
| C164 | 13.87033 | -7.13844 | 5.114992 |
| C165 | 15.30883 | -7.22454 | 5.394338 |
| C166 | 16.13397 | -6.05337 | 5.349719 |
| N167 | 16.4648  | -3.63445 | 4.902041 |
| C168 | 18.54522 | -1.41492 | 4.838787 |
| C169 | 19.41963 | -0.15828 | 4.795462 |
| C170 | 20.85419 | -0.40596 | 5.025378 |
| H171 | 13.69346 | -3.64498 | 4.369618 |
| H172 | 12.19283 | -5.72341 | 4.542854 |
| H173 | 15.80351 | -8.22592 | 5.661962 |
| S174 | 17.94962 | -6.31926 | 5.471487 |



|      |          |          |          |
|------|----------|----------|----------|
| H175 | 21.10306 | -1.4871  | 5.375522 |
| O176 | 18.45404 | -5.20191 | 6.590093 |
| O177 | 18.52831 | -5.95514 | 4.140778 |
| O178 | 18.17574 | -7.68227 | 6.064417 |
| H179 | 18.85647 | -5.7105  | 7.392321 |
| O180 | 11.78069 | 15.24788 | 4.88906  |
| O181 | 19.56772 | 2.305605 | 4.88906  |
| C182 | 11.87855 | 11.13107 | 5.021448 |
| C183 | 11.09033 | 9.917135 | 4.727277 |
| C184 | 11.69274 | 8.616193 | 4.795937 |
| C185 | 13.11715 | 8.442757 | 5.114992 |
| C186 | 13.91096 | 9.645484 | 5.394338 |
| C187 | 13.30927 | 10.94566 | 5.349719 |
| N188 | 11.37984 | 12.44163 | 4.902041 |
| C189 | 10.49788 | 15.35308 | 4.838787 |
| C190 | 9.8468   | 16.73867 | 4.795462 |
| C191 | 10.77858 | 17.8572  | 5.025378 |
| H192 | 10.00328 | 10.03631 | 4.369618 |
| H193 | 11.05294 | 7.697509 | 4.542854 |
| H194 | 15.02552 | 9.573192 | 5.661962 |
| S195 | 14.44736 | 12.38511 | 5.471487 |
| H196 | 11.8393  | 17.53215 | 5.375522 |

|      |          |          |          |
|------|----------|----------|----------|
| O197 | 13.73192 | 13.38063 | 6.590093 |
| O198 | 14.42137 | 13.06834 | 4.140778 |
| O199 | 15.74082 | 11.89944 | 6.064417 |
| H200 | 14.37358 | 13.47485 | 7.392321 |
| C201 | 3.700661 | 15.18844 | 5.021448 |
| C202 | 3.043469 | 16.47802 | 4.727277 |
| C203 | 1.615619 | 16.6068  | 4.795937 |
| C204 | 0.753214 | 15.45994 | 5.114992 |
| C205 | 1.3979   | 14.17112 | 5.394338 |
| C206 | 2.824733 | 14.04211 | 5.349719 |
| N207 | 5.084994 | 14.96506 | 4.902041 |
| C208 | 8.047364 | 14.27313 | 4.838787 |
| C209 | 9.572859 | 14.14419 | 4.795462 |
| C210 | 10.07565 | 12.77798 | 5.025378 |
| H211 | 3.690203 | 17.35985 | 4.369618 |
| H212 | 1.139914 | 17.62022 | 4.542854 |
| H213 | 0.778012 | 13.24202 | 5.661962 |
| S214 | 3.502286 | 12.33677 | 5.471487 |
| H215 | 9.263782 | 12.02189 | 5.375522 |
| O216 | 4.722149 | 12.45859 | 6.590093 |
| O217 | 4.106972 | 12.01766 | 4.140778 |
| O218 | 2.434951 | 11.45943 | 6.064417 |

|      |          |          |          |
|------|----------|----------|----------|
| H219 | 4.482916 | 11.85579 | 7.392321 |
| O220 | 19.09551 | -2.57847 | 4.88906  |
| O221 | 15.10188 | 0.27251  | 4.88906  |
| C222 | 11.30339 | 20.24202 | 5.021448 |
| C223 | 12.7488  | 20.16637 | 4.727277 |
| C224 | 13.57424 | 21.33854 | 4.795937 |
| C225 | 13.01224 | 22.65883 | 5.114992 |
| C226 | 11.57374 | 22.74493 | 5.394338 |
| C227 | 10.7486  | 21.57376 | 5.349719 |
| N228 | 10.41777 | 19.15484 | 4.902041 |
| C229 | 8.337356 | 16.93531 | 4.838787 |
| C230 | 7.462941 | 15.67867 | 4.795462 |
| C231 | 6.028378 | 15.92635 | 5.025378 |
| H232 | 13.18912 | 19.16537 | 4.369618 |
| H233 | 14.68975 | 21.2438  | 4.542854 |
| H234 | 11.07907 | 23.74631 | 5.661962 |
| S235 | 8.932954 | 21.83965 | 5.471487 |
| H236 | 5.779516 | 17.00749 | 5.375522 |
| O237 | 8.428527 | 20.7223  | 6.590093 |
| O238 | 8.354261 | 21.47553 | 4.140778 |
| O239 | 8.706831 | 23.20266 | 6.064417 |
| H240 | 8.026105 | 21.23089 | 7.392321 |

**Table S3.** Element analysis results for TB-COF.

| <b>TB-COF</b><br>(formula)                                                       |        | <b>C (wt%)</b> | <b>N (wt%)</b> | <b>H (wt%)</b> | <b>S (wt%)</b> |
|----------------------------------------------------------------------------------|--------|----------------|----------------|----------------|----------------|
| C <sub>108</sub> H <sub>60</sub> N <sub>12</sub> O <sub>48</sub> S <sub>12</sub> | Calcd. | 48.43          | 6.29           | 2.24           | 14.35          |
|                                                                                  | Found. | 48.59          | 5.41           | 3.61           | 13.96          |

**Table S4.** Comparison of proton conductivity with reported COFs materials in anhydrous conditions.

| Material                                      | Temperature (°C) | Proton conductivity (S cm <sup>-1</sup> ) | References                                                  |
|-----------------------------------------------|------------------|-------------------------------------------|-------------------------------------------------------------|
| COF-F6                                        | 140              | $3.63 \times 10^{-11}$                    | J. Am. Chem. Soc., 2020, <b>142</b> , 14357–14364.          |
| TPB-DMeTP-COF                                 | 160              | $9.6 \times 10^{-11}$                     | Nat. Commun., 2020, <b>11</b> , 8–15.                       |
| TpPa-SO <sub>3</sub> H                        | 120              | $1.7 \times 10^{-5}$                      | Chem. Mater., 2016, <b>28</b> , 1489–1494.                  |
| TB-COF                                        | 120              | $1.52 \times 10^{-4}$                     | This work                                                   |
| Phytic@TpPa-(SO <sub>3</sub> H-Py)            | 120              | $5 \times 10^{-4}$                        | Chem. Mater. 2016, <b>28</b> , 1489-1494.                   |
| PA@Tp-Azo                                     | 67               | $6.7 \times 10^{-5}$                      | J. Am. Chem. Soc., 2014, <b>136</b> , 6570–6573.            |
| Tri@TPB-DMTP-COF                              | 130              | $1.10 \times 10^{-3}$                     | Nat. Mater., 2016, <b>15</b> , 722–726.                     |
| Im@TPB-DMTP-COF                               | 130              | $4.37 \times 10^{-3}$                     |                                                             |
| PA@TpBpy-ST                                   | 120              | $1.98 \times 10^{-3}$                     | J. Mater. Chem. A, 2016, <b>4</b> , 2682–2690.              |
| PA@TpBpy-MC                                   | 120              | $2.5 \times 10^{-3}$                      |                                                             |
| PA@EB-COF                                     | 130              | $5.88 \times 10^{-3}$                     | J. Mater. Chem. A, 2020, <b>8</b> , 13702–13709.            |
| Tra@EB-COF                                    | 130              | $2.31 \times 10^{-3}$                     |                                                             |
| H <sub>3</sub> PO <sub>4</sub> @TPB-DMeTP-COF | 120              | $7.59 \times 10^{-2}$                     | Nat. Commun., 2020, <b>11</b> , 8–15.                       |
| H <sub>3</sub> PO <sub>4</sub> @COF-F6        | 140              | $4.2 \times 10^{-2}$                      | J. Am. Chem. Soc., 2020, <b>142</b> , 14357–14364.          |
| H <sub>3</sub> PO <sub>4</sub> @TPB-DABI-COF  | 120              | $9.71 \times 10^{-2}$                     | Angew. Chemie - Int. Ed., 2021, <b>60</b> , 12918–12923.    |
| F6-[dema]HSO <sub>4</sub> -1.5                | 140              | $1.33 \times 10^{-2}$                     | ACS Appl. Mater. Interfaces, 2021, <b>13</b> , 37172–37178. |
| Im@ Py-TT-COF-50                              | 130              | $03.08 \times 10^{-3}$                    | ACS Appl. Mater. Interfaces, 2020, <b>12</b> , 22910–22916. |
| PIL-TB-COF                                    | 120              | $2.21 \times 10^{-3}$                     | This work                                                   |
